# Supplementary material for: Efficient 1,4-addition of α-substituted fluoro(phenylsulfonyl)methane derivatives to α,β-unsaturated compounds
Source: Beilstein J Org Chem. 2008 May 21;4:17. doi: 10.3762/bjoc.4.17 (PMC2486456; doi:10.3762/bjoc.4.17)
Supplement: File 1 — Experimental procedures, full spectroscopic data and spectra. [file Beilstein_J_Org_Chem-04-17-s001.doc]

**Supporting Information (Part 1)**

**Efficient 1,4-addition of -substituted fluoro(phenylsulfonyl)methane derivatives to ,-unsaturated compounds**

*G. K. Surya Prakash,* Xiaoming Zhao, Sujith Chacko, Fang Wang, Habiba Vaghoo and George A. Olah**

*Loker Hydrocarbon Research Institute and Department of Chemistry, University of Southern California, Los Angeles, California 90089-1661*

[*gprakash@usc.edu*](mailto:gprakash@usc.edu)*, olah@usc.edu*

Supporting Information S2-S13

Spectra S14-S34

**Experimental Section**

Unless otherwise mentioned, all other reagents were purchased from commercial sources. Diethyl ether and THF were all distilled under nitrogen over sodium/benzophenone prior to use. Toluene was distilled over sodium. Column chromatography was carried out using silica gel (60-200 mesh).

1H, 13C and 19F NMR spectra were recorded on Varian Mercury 400 NMR spectrometers. 1H NMR chemical shifts were determined relative to internal (CH3)4Si (TMS) at δ 0.0 ppm or to the signal of a residual protonated solvent: CDCl3 δ 7.26 ppm. 13C NMR chemical shifts were determined relative to internal TMS at δ 0.0 ppm or to the 13C signal of solvent: CDCl3 δ 77.16 ppm. 19F NMR chemical shifts were determined relative to internal CFCl3 at δ 0.0 ppm.

**A general procedure for the oxidation of sulfides**

Aqueous hydrogen peroxide (13.5 mL, 160 mmol, 30% wt) was added into a solution of the sulfide (40 mmol) in CH3CO2H (60 mL) at 0 C and the reaction mixture was stirred about 2 h. The reaction mixture was allowed to warm to room temperature and stirred overnight. The mixture was poured into ice water (200 mL) and extracted with dichloromethane (200 mL). The organic phase was washed with ice water (200 mL × 3), dried over MgSO4, and evaporated. The residue was purified by column chromatography to afford the title product (**2a**–**2e**). The characterization data of (**2a**–**2e**) [1-6], **3a** [7], **3c** [8] and **3d** [9] are consistent with those reported earlier.

**(Nitromethylsulfonyl)benzene** (**2a**):

White solid, 90% yield. 1H NMR (CDCl3):  5.60 (s, 2H), 7.64–7.68 (m, 2H), 7.78–7.82 (m, 1H), 7.96–7.99 (m, 2H).

**2-(Phenylsulfonyl)acetonitrile** (**2b**):

Colorless oil, 76% yield. 1H NMR (CDCl3):  4.07 (s, 2H), 7.65–7.70 (m, 2H), 7.77–7.82 (m, 1H), 8.04–8.06 (m, 2H).

**Ethyl 2-(phenylsulfonyl)acetate** (**2c**):

Colorless oil, in 83% yield. 1H NMR (CDCl3):  1.29 (t, *J* = 7.2 Hz, 3H), 4.26–4.42 (m, 2H), 7.59–7.64 (m, 2H), 7.73–7.78 (m, 1H), 7.93–7.95 (m, 2H).

**1-(Phenylsulfonyl)propan-2-one** (**2d**):

Colorless oil, in 70% yield. 1H NMR (CDCl3):  2.42 (s, 3H), 4.16 (s, 2H), 7.57–7.61 (m, 2H), 7.68–7.72 (m, 1H), 7.88–7.91 (m, 2H).

**(Allylsulfonyl)benzene** (**2e**):

Colorless oil, in 91% yield. 1H NMR (CDCl3):  3.80–3.82 (m, 2H), 5.12–5.13 (m, 1H), 5.16–5.17 (m, 1H), 5.74–5.84 (m, 1H), 7.53–7.58 (m, 2H), 7.63–7.86 (m, 1H), 7.87–7.89 (m, 2H).

**Improved procedure for the monofluorination with Selectfluor**: To a slurry of NaH (6.75 mmol) in THF (15 mL) was added a solution of 1-substituted (phenylsulfonyl)methane (6.75 mmol) in THF (10 mL) at 0 C under argon. After stirring for 2 h, a solution of Selectfluor (6.75 mmol) in anhydrous DMF (15 mL) was added dropwise to the above-mentioned mixture at 0 C and the reaction mixture was stirred overnight, and monitored by TLC. After completion of the reaction, CH2Cl2 (20 mL) was added and the mixture was washed with water, brine, then the organic phase was dried with MgSO4 and filtered. The filtrate was evaporated, and the residue was purified by column chromatography to give the title product in good yield.

**[Fluoro(nitro)methylsulfonyl]benzene (3a):**

White solid isolated in 62% yield. 1H NMR (CDCl3):  6.44 (d, *J* = 48.4 Hz, 1H), 7.66−7.70 (m, 2H), 7.83−7.87 (m, 1H), 7.94−7.96 (m, 2H). 13C NMR (CDCl3):  111.81 (d, *J* = 283.0 Hz), 130.06, 130.72, 131.43, 136.84. 19F NMR (CDCl3):  −142.16 (d, *J* = 48.4 Hz, 1F).

**2-Fluoro-2-(phenylsulfonyl)acetonitrile (3b):**

Colorless oil isolated in 45% yield. 1H NMR (CDCl3):  5.69 (d, *J* = 46.8 Hz, 1H), 7.68–7.73 (m, 2H), 7.84–7.88 (m, 1H), 8.04–8.07 (m, 2H). 13C NMR (CDCl3):  88.11 (d, *J* = 232.3 Hz), 109.87 (d, *J* = 29.5 Hz), 130.00, 130.69, 132.25, 136.59. 19F NMR (CDCl3):  −179.23 (d, *J* = 47.8 Hz, 1F). HRMS Calcd for C8H6FNO2S: 199.0103; Found: 199.0107.

**Ethyl 2-fluoro-2-(phenylsulfonyl)acetate (3c):**

Colorless oil isolated in 56% yield. 1H NMR (CDCl3):  1.29 (t, *J* = 7.2 Hz, 3H), 4.29 (q, 2H), 5.57 (d, *J* = 48.0 Hz, 1H), 7.59–7.64 (m, 2H), 7.73–7.78 (m, 1H), 7.93–7.96 (m, 2H). 13C NMR (CDCl3):  14.03, 63.64, 97.39 (d, *J* = 232.5 Hz), 129.54, 129.93, 134.65, 135.46, 161.11 (d, *J* = 22.9 Hz). 19F NMR (CDCl3):  −180.91 (d, *J* = 48.0 Hz, 1F).

**1-Fluoro-1-(phenylsulfonyl)propan-2-one (3d):**

White solid isolated in 61% yield. 1H NMR (CDCl3):  2.37 (d, *J* = 3.6 Hz, 3H), 5.46 (d, *J* = 49.2 Hz, 1H), 7.61–7.65 (m, 2H), 7.75–7.77 (m, 1H), 7.92–7.95 (m, 2H). 13C NMR (CDCl3):  27.65, 101.51 (d, *J* = 874.8 Hz), 129.68, 129.74, 134.95, 135.51, 195.71 (d, *J* = 81.7 Hz). 19F NMR (CDCl3):  −113.56 (tq, *J* = 49.2 Hz, 3.6 Hz, 1F).

**General procedure**:

To a solution of fluorine-substituted active methylene derivative (0.2 mmol, 1 equivalent) and methyl vinyl ketone (0.6 mmol, 3 equivalents) in THF (0.5 mL) was added trimethylphosphine (0.04 mmol, 1.0 M in THF) dropwise by syringe at room temperature under argon, and the reaction was monitored by TLC. After completion of the reaction, the solvents were removed under vacuum. The crude products were purified by column chromatography (hexane/ ethyl acetate = 3/1) to afford the products in good to excellent yield.

**5-Fluoro-5-nitro-5-(phenylsulfonyl)pentan-2-one (5a):**

White solid isolated in 93% yield. 1H NMR (CDCl3):  2.18 (s, 3H), 2.50–2.56 (m, 1H), 2.70–2.78 (m, 1H), 2.88–2.92 (m, 1H), 2.98–3.09 (m, 1H), 7.62–7.66 (m, 2H), 7.79–7.83 (m, 1H), 7.91–7.94 (m, 2H). 13C NMR (CDCl3):  25.56 (d, *J* = 17.9 Hz), 27.19, 30.01, 35.53 (d, *J* = 2.2 Hz), 123.63 (d, *J*=282.4), 125.04, 129.91, 131.09, 131.33, 136.55, 203.79. 19F NMR (CDCl3):  −125.90, −125.96 (dd, *J*1 = 28.6 Hz, 10.5 Hz, 1F). HRMS: (FAB) calcd for C11H13FNO5S 290.0499 (M+1) found: m/z 290.0500.

**2-Fluoro-5-oxo-2-(phenylsulfonyl)hexanenitrile (5b):**

White solid isolated in 90% yield. 1H NMR (CDCl3):  2.23 (s, 3H), 2.66–2.75 (m, 1H), 2.85–2.92 (m, 1H), 7.65–7.69 (m, 2H), 7.81–7.85 (m, 1H), 8.02–8.04 (m, 2H). 13C NMR (CDCl3):  25.84 (d, *J* = 21.4 Hz), 30.00, 36.82 (d, *J* = 2.4 Hz), 99.20 (d, *J* = 228.8 Hz), 112.24 (d, *J* = 33.1 Hz), 129.75, 131.14, 132.04, 136.32, 204.03. 19F NMR (CDCl3):  −148.50 (dd, *J*= 27.1 Hz, 16.9 Hz, 1F). HRMS: (FAB) calcd for C12H13FNO3S 270.0600 (M+1) found: m/z 270.0612.

**Ethyl 2-fluoro-5-oxo-2-(phenylsulfonyl)hexanoate (5c):**

White solid isolated in 75% yield. 1H NMR (CDCl3):  1.20 (t, *J* = 7.2 Hz, 3H), 2.14 (s, 3H), 2.49–2.56 (m, 2H), 2.67–2.78 (m, 2H), 4.15–4.23 (m, 2H), 7.56–7.60 (m, 2H), 7.70–7.74 (m, 1H), 7.89–7.92 (m, 2H). 13C NMR (CDCl3):  13.93, 25.28 (d, *J* = 19.9 Hz), 29.92, 36.48 (d, *J* = 3.2 Hz), 63.58, 106.26 (d, *J* = 233.3 Hz), 129.30, 130.45, 134.13, 135.24, 163.63 (d, *J* = 24.8 Hz), 205.27. 19F NMR (CDCl3):  −158.34 (m, 1F). HRMS: (FAB) calcd for C14H18FNO5S 317.0859 (M+1) found: m/z 317.0861.

**5-Fluoro-5,5-bis(phenylsulfonyl)pentan-2-one (5d):**

White solid isolated in 91% yield. 1H NMR (CDCl3):  2.17 (s, 3H), 2.56–2.64 (m, 2H), 3.05–3.09 (m, 2H), 7.55–7.59 (m, 4H), 7.72–7.76 (m, 2H), 7.91–7.93 (m, 4H). 13C NMR (CDCl3):  24.81 (d, *J* = 18.9 Hz), 29.95, 36.51 (d, *J* = 6.2 Hz), 115.07 (d, *J* = 264.4 Hz), 129.20, 130.99, 134.89, 135.52. 19F NMR (CDCl3):  −140.70 (t, *J* = 15.4 Hz, 1F). HRMS: (FAB) calcd for C17H18FO5S2 385.0580(M+1) found: m/z 385.0565.

**Ethyl 4-fluoro-4-nitro-4-(phenylsulfonyl)butanoate (5e):**

White solid isolated in 64% yield. 1H NMR (CDCl3):  1.26 (t, *J* = 7.2 Hz, 3H), 2.31–2.39 (m, 1H), 2.50–2.58 (m, 1H), 2.87–2.95 (m, 1H), 3.04–3.20 (m, 1H), 4.11 (q, *J* = 7.2 Hz, 2H), 7.58–7.62 (m, 2H), 7.76–7.80 (m, 1H), 7.88–7.90 (m, 2H). 13C NMR (CDCl3):  14.37, 26.70 (d, *J* = 18.2 Hz), 27.04 (d, *J* = 3.8 Hz), 61.73, 123.43 (d, *J* = 282.8 Hz), 130.04, 131.22, 131.27, 136.73, 170.35. 19F NMR (CDCl3):  −126.70 (dd, *J*= 30.1 Hz, 9.8 Hz, 1F). HRMS: (FAB) calcd for C12H15FNO6S 320.0604 (M+1) found: m/z 320.0612.

**Ethyl 4-cyano-4-fluoro-4-(phenylsulfonyl)butanoate (5f)**

White solid isolated in 60% yield. 1H NMR (CDCl3):  1.30 (t, *J* = 7.2 Hz, 3H), 2.70–2.83 (m, 4H), 4.17–4.22 (m, *J* = 7.2 Hz, 2H), 7.66–7.70 (m, 2H), 7.81–7.86 (m, 1H), 8.03–8.06 (m, 2H). 13C NMR (CDCl3):  14.32, 27.59 (d, *J* = 18.9 Hz), 28.33 (d, *J* = 3.0 Hz), 61.59, 99.04 (d, *J* = 228.8 Hz), 112.15 (d, *J* = 33.2 Hz), 129.86, 131.28, 132.08, 136.44, 170.49. 19F NMR (CDCl3):  −149.63 (m, 1F). HRMS: (FAB) calcd for C13H15FNO4S 300.0706 (M+1) found: m/z 300.0719.

**Diethyl 2-fluoro-2-(phenylsulfonyl)pentanedioate (5g):**

White solid isolated in 71% yield. 1H NMR (CDCl3):  1.18–1.25 (m, 6H), 2.32–2.38 (m, 1H), 2.55–2.59 (m, 2H), 2.76–2.84 (m, 1H), 4.06–4.21 (m, 4H), 7.54–7.58 (m, 2H), 7.68–7.72 (m, 1H), 7.87–7.90 (m, 2H). 13C NMR (CDCl3):  14.15, 14.41, 26.63 (d, *J* = 20.2 Hz), 28.05 (d, *J* = 3.4 Hz), 61.31, 63.82, 106.38 (d, *J* = 234.5 Hz), 129.51, 130.67, 134.23, 135.47, 163.61 (d, *J* = 25.5 Hz), 171.40. 19F NMR (CDCl3):  −159.13 (dd, *J*= 31.2 Hz, 10.5 Hz, 1F). HRMS: (FAB) calcd for C15H20FNO6S 347.0965 (M+1) found: m/z 347.0962.

**Ethyl 4-fluoro-4,4-bis(phenylsulfonyl)butanoate (5h):**

White solid isolated in 88% yield. 1H NMR (CDCl3):  1.20 (t, *J* = 7.2 Hz, 3H), 2.62–2.71 (m, 2H), 2.78–2.83 (m, 2H), 4.04–4.09 (m, 2H), 7.51–7.56 (m, 2H), 7.68–7.72 (m, 1H), 7.88–7.90 (m, 2H). 13C NMR (CDCl3):  14.22, 26.01 (d, *J* = 19.4 Hz), 27.69 (d, *J* = 7.7 Hz), 61.06, 114.75 (d, *J* = 266.1 Hz), 129.21, 130.96, 134.85, 135.52, 171.43. 19F NMR (CDCl3):  −142.91 (t, *J* = 15.8 Hz, 1F). HRMS: (FAB) calcd for C18H20FO6S2 415.0685 (M+1) found: m/z 415.0673.

**General procedure**:

To a solution of fluorine-substituted active methylene derivative (0.16 mmol, 1 equivalent) and ,-unsaturated compound (0.16 mmol, 1 equivalent) in DMF (2 mL) was added potassium carbonate (0.36 mmol, 0.050 g) at room temperature and the reaction was monitored by 19F NMR. Aqueous work up followed by extraction with dichloromethane (3 x 15 mL) afforded the crude product. The pure product was obtained by column chromatography.

**4,4-Bis(benzenesulfonyl)-4-fluoro-2-methyl-butyric acid methyl ester (6a)**

Colorless oil isolated in 70% yield. 1H NMR (CDCl3):  1.18 (d, *J* = 6.8 Hz, 3H), 2.44–2.58 (m, 1H), 2.50–2.58 (m, 1H), 2.92 (dd, *J* = 29.4 Hz, 0.5 Hz, 1H), 2.96–3.11 (m, 2H), 3.51 (s, 3H), 7.55–7.61 (m, 4H), 7.71–7.77 (m, 2H), 7.87–7.99 (m, 4H). 13C NMR (CDCl3):  18.99, 32.84 (d, *J* = 17.5 Hz), 34.74 (d, *J* = 5.8 Hz), 51.95, 114.80 (d, *J* = 268.6 Hz), 128.96, 129.01, 130.93, 130.95, 134.41, 134.77, 135.28, 135.32, 175.07 19F NMR (CDCl3):  −146.50 (dd, *J* = 22.8 Hz, 10.5 Hz, 1F) HRMS: (FAB) calcd for C18H19FO6S2 415.0685 (M+1) found: m/z 415.0668.

**4,4-Bis(benzenesulfonyl)-4-fluoro-2-methyl-butyric acid tert-butyl ester (6c)**

White solid isolated in 70% yield. 1H NMR (CDCl3):  1.13 (d, *J* = 7.1Hz, 3H), 1.34 (s, 9H), 2.43 (ddd, *J* =23.5 Hz, 15.8 Hz, 3.9 Hz, 1H), 2.80–2.90 (m, 1H), 2.91–3.02 (m, 1H), 7.54–7.62 (m, 4H), 7.70–7.77 (m, 2H), 7.88–8.00 (m, 4H). 13C NMR (CDCl3):  19.03, 27.75 (d, *J* = 11.9 Hz), 32.81 (d, *J* = 17.3 Hz), 35.76 (d, *J* = 5.7 Hz), 80.52, 115.11 (d, *J* = 268.4 Hz), 128.96, 129.01, 130.96, 134.53, 134.95, 135.23, 135.26, 173.93. 19F NMR (CDCl3):  −146.17 (dd, *J* = 10.7 Hz, 23.6 Hz, 1F) HRMS: (FAB) calcd for C21H25FO6S2 457.1155 (M+1) found: m/z 457.1147.

**3-[Bis(benzenesulfonyl)-fluoro-methyl]-cyclohexanone (6d)**

White solid isolated in 90% yield. 1H NMR (CDCl3):  1.40–1.56 (m, 1H), 2.15–2.25 (m, 1H), 2.30–2.47 (m, 3H), 2.52–2.80 (m, 3H), 3.03–3.13 (m, 1H), 7.48–7.57 (m, 4H), 7.68–7.75 (m, 2H), 7.77–7.83 (m, 2H), 7.85–7.91 (m, 2H) 13C NMR (CDCl3):  25.10, 25.15, 41.07, 41.36 (d, *J* = 6.9 Hz), 42.67 (d, *J* = 17.2 Hz), 114.41 (d, *J* = 266.4 Hz), 114.45, 128.83, 129.09, 130.58, 130.59, 130.76, 130.78, 134.87, 135.20, 135.34, 135.77, 207.82. 19F NMR (CDCl3):  −136.36 (s, 1F) HRMS: (FAB) calcd for C19H19FO5S2 411.0736 (M+1) found: m/z 411.0740.

**6,6-Bis(benzenesulfonyl)-6-fluoro-hexan-3-one (6e)**

White solid isolated in 79% yield. 1H NMR (CDCl3): .1.04 (d, *J* = 7.4 Hz, 3H), 2.46 (q, *J* = 7.3 Hz, 2H), 2.58–2.68 (m, 2H), 3.00–3.08 (m, 2H), 7.55–7.62 (m, 4H), 7.70–7.77 (m, 2H), 7.90–7.95 (m, 4H) 13C NMR (CDCl3):  24.75 (d, *J* = 18.4 Hz), 35.00, 35.05, 35.82, 115.03 (d, *J* = 264.5 Hz), 129.06, 130.83, 130.85, 134.79, 135.37, 207.99. 19F NMR (CDCl3):  −140.74 (t, *J* = 15.9 Hz, 1F) HRMS: (FAB) calcd for C18H19FO5S2 399.0736 (M+1) found: m/z 399.0742.

**3,3-Bis(benzenesulfonyl)-3-fluoro-1-(methylsulfonyl)propane (6f)**

White solid isolated in 60% yield. 1H NMR (CDCl3): .2.77–2.87 (m, 2H), 2.99 (s, 3H), 3.60–3.67 (m, 2H), 7.57–7.63 (m, 4H), 7.74–7.80 (m, 2H), 7.91–7.96 (m, 4H) 13C NMR (CDCl3):  24.01(d, *J* = 20.7 Hz), 40.99, 48.12 (d, *J* = 6.9 Hz), 113.11 (d, *J* = 266.1Hz), 129.29, 130.94, 134.01, 135.82 19F NMR (CDCl3):  −140.35 (t, *J* = 14.0 Hz, 1F) HRMS: (FAB) calcd for C16H17FO6S3 421.0249 (M+1) found: m/z 421.0262.

**4,4-Bis(benzenesulfonyl)-4-fluoro-butyronitrile (6g)**

White solid. 1H NMR (CDCl3):  2.70–2.79 (m, 2H), 2.91–2.97 (m, 2H), 7.56–7.63 (m, 4H), 7.80–7.74 (m, 2H), 7.88–7.93 (m, 4H). 13C NMR (CDCl3):  12.07 (d, *J =* 9.2 Hz), 26.94 (d, *J* = 18.4 Hz), 113.00 (d, *J* = 267.6 Hz), 117.561, 129.34, 130.83, 134.10, 135.82. 19F NMR (CDCl3):  −145.04 (t, *J* = 15.5 Hz, 1F) HRMS: (FAB) calcd for C16H14FNO4S2 368.0426 (M+1) found: m/z 368.0445.

**2-[2,2-Bis(benzenesulfonyl)-2-fluoroethyl]-pentanedinitrile (6h)**

White solid. 1H NMR (CDCl3):  1.90**–**2.20 (m, 2H), 2.43–2.68 (m, 2H), 2.76–2.88 (m, 2H), 3.32–3.42 (m, 1H), 7.55–7.64 (m, 4H), 7.74–7.82 (m, 2H), 7.84–7.88 (m, 2H), 7.93–7.97 (m, 2H). 13C NMR (CDCl3):  15.09, 25.95 (d, *J =* 5.4 Hz), 28.81, 32.13 (d, *J =* 17.6 Hz), 112.95 (d, *J =* 269.9 Hz), 117.37, 118.56, 129.32, 129.51, 130.80, 131.01, 133.35, 133.95, 135.95. 19F NMR (CDCl3):  −146.55 (dd, *J* = 19.5 Hz, 12.9 Hz, 1F) HRMS: (FAB) calcd for C19H17FN2O4S2 421.0692 (M+1) found: m/z 421.0688.

**4,4-Bis(benzenesulfonyl)-4-fluoro-but-2-enoic acid methyl ester (6j)**

*cis*

1H NMR (CDCl3):  3.75 (s, 3H), 5.97 (d, *J* = 15.7 Hz, 1H), 7.27 (dd, *J* = 23.1 Hz, 15.7 Hz, 1H), 7.55–7.61 (m, 4H), 7.72–7.78 (m, 2H), 7.91–7.96 (m, 4H). 13C NMR (CDCl3):  52.43, 112.86 (d, *J =* 269.1 Hz), 129.12, 129.77 (d, *J =* 9.2 Hz), 130.59 (d, *J =* 14.6 Hz), 130.89, 134.40, 135.79. 19F NMR (CDCl3):  −150.93 (d, *J* = 23.1 Hz, 1F) HRMS: (FAB) calcd for C17H15FO6S2 399.0372 (M+1) found: m/z 399.0379.

*trans*

1H NMR (CDCl3):  3.42 (s, 3H), 6.18 (dd, *J* = 12.9 Hz, 1.3 Hz, 1H), 6.44 (dd, *J* = 28.5 Hz, 12.9 Hz, 1H), 7.56–7.62 (m, 4H), 7.73–7.78 (m, 2H), 7.93–7.98 (m, 4H).  13C NMR (CDCl3):  51.96, 113.53 (d, *J =* 273.0 Hz), 121.26 (d, *J =* 13.80 Hz), 128.98, 130.78 (d, *J =* 3.07 Hz), 131.06, 134.48, 135.54, 164.13. 19F NMR (CDCl3):  −150.60 (d, *J* = 28.5 Hz, 1F) HRMS: (FAB) calcd for C17H15FO6S2 399.0372 (M+1) found: m/z 399.0379.

**4,4-Bis(benzenesulfonyl)-4-fluoro-but-2-enoic acid ethyl ester (6k)**

*cis*

White solid. 1H NMR (CDCl3):  1.28 (t, *J* = 7.1 Hz, 3H), 4.19 (q, *J* = 7.1 Hz, 2H), 5.96 (dd, *J =* 15.7 Hz, 0.4 Hz, 1H), 7.25 (dd, *J* = 23.1 Hz, 15.7 Hz, 1H), 7.55–7.62 (m, 4H), 7.72–7.78 (m, 2H), 7.91–7.96 (m, 4H). 13C NMR (CDCl3) :  14.00, 61.44, 112.80 (d, *J =* 269.1 Hz), 129.06, 130.09 (d, *J =* 9.1 Hz), 130.21 (d, *J =* 3.2 Hz), 130.79, 134.31, 135.75, 163.23. 19F NMR (CDCl3):  −150.90 (d, *J* = 23.1 Hz, 1F) HRMS: (FAB) calcd for C18H17FO6S2 413.0529 (M+1) found: m/z 413.0543.

*trans*

White solid. 1H NMR (CDCl3):  1.07 (dt, *J* = 7.1 Hz, 0.4 Hz, 3H), 3.91 (q, *J* = 7.1Hz, 2H), 6.17 (dd, *J* = 12.9 Hz, 1.3 Hz, 1H), 6.41 (dd, *J* = 28.7 Hz, 13.0 Hz, 1H), 7.56–7.62 (m, 4H), 7.73–7.78 (m, 2H), 7.94–7.98 (m, 4H).  13C NMR (CDCl3):  13.85, 61.08, 113.63 (d, *J* = 274.0 Hz), 120.68 (d, *J* = 13.8 Hz), 128.97, 130.98, 130.99, 131.26 (d, *J* = 2.9 Hz), 134.55, 135.50, 163.69. 19F NMR (CDCl3):  −150.32 (d, *J* = 28.7 Hz, 1F) HRMS: (FAB) calcd for C18H17FO6S2 413.0529 (M+1) found: m/z 413.0543.

**4-(Benzenesulfonyl)-4-fluoro-4-nitro-but-2-enoic acid ethyl ester (6l)**

White solid. 1H NMR (CDCl3):  1.23 (t, *J =* 7.1 Hz), 4.16 (q , *J =* 7.2 Hz), 6.50 (dd, *J =* 12.4, 2.4 Hz, 1H), 6.79 (dd, *J =* 18.7, 12.3 Hz, 1H), 7.63–7.69 (m, 2H), 7.81–7.87 (m, 1H), 7.92–7.97 (m, 2H). 13C NMR (CDCl3):  13.78, 61.94, 123.83 (d, *J =* 15.3 Hz), 129.68, 131.17, 131.50 (d, *J =* 288.3 Hz), 136.56, 163.12. 19F NMR (CDCl3):  −119.05 (d, *J* = 18.3 Hz, 1F) HRMS: (FAB) calcd for C12H12FNO6S 318.0447 (M+1) found: m/z 318.0445.

**References**

1. Wade, P. A.; Hinney, H. R.; Amin, N. V.; Vail, P. D.; Morrow, S. D.; Hardinger, S. A.; Saft, M. S. *J. Org. Chem.* **1981,** *46,* 765–770. doi:10.1021/jo00317a023
2. Truce, W. E.; Klingler, T. C.; Paar, J. E.; Feuer, H.; Wu, D. K. *J. Org. Chem.* **1969,** *34,* 3104–3107. doi:10.1021/jo01262a068
3. Walker, D. *J. Org. Chem.* **1966,** *31,* 835–837. doi:10.1021/jo01341a045
4. Doyle, K. J.; Moody, C. J. *Tetrahedron* **1994,** *50,* 3761–3772. doi:10.1016/S0040-4020(01)90396-5
5. Ohta, H.; Kato, Y.; Tsuchihashi, G. *J. Org. Chem.* **1987,** *52,* 2735–2739. doi:10.1021/jo00389a018
6. Sheldrake, H. M.; Wallace, T. W. *Tetrahedron Lett.* **2007,** *48,* 4407–4411. doi:10.1016/j.tetlet.2007.04.099
7. Prakash, G. K. S.; Chacko, S.; Alconcel, S.; Stewart, T.; Mathew, T.; Olah, G. A. *Angew. Chem., Int. Ed.* **2007,** *46,* 4933–4936. doi:10.1002/anie.200700834
8. Takeuchi, Y.; Asahina, M.; Hori, K.; Koizumi, T. *J. Chem. Soc., Perkin Trans. 1* **1988,** 1149–1153. doi:10.1039/P19880001149
9. Takeuchi, Y.; Ogura, H.; Kanada, A.; Koizumi, T. *J. Org. Chem.* **1992,** *57,* 2196–2199. doi:10.1021/jo00033a058
